# Supplementary material for: Mineralization of unique barium carbonate crystal superstructures controlled by a liquid crystalline phase polymer
Source: Royal Society of Chemistry journal article supplement (doi:10.1039/c2ce05819g), 2012-01-01
Supplement: c2ce05819g.pdf [file c2ce05819g.pdf]

## Electronic Supplementary Information

### Mineralization of unique barium carbonate crystal superstructure controlled by a liquid crystalline phase polymer

Xiao-Hui Guo<sup>a, b\*</sup>, Fanli Meng<sup>b</sup>, Xiaoni Qu<sup>b</sup>, Mengjiao Wang<sup>b</sup>, Chaochao Mao<sup>b</sup>, Ji Zhang<sup>b</sup>, Wanv Wang<sup>b</sup>,  
Shu-Hong Yu<sup>a\*</sup>

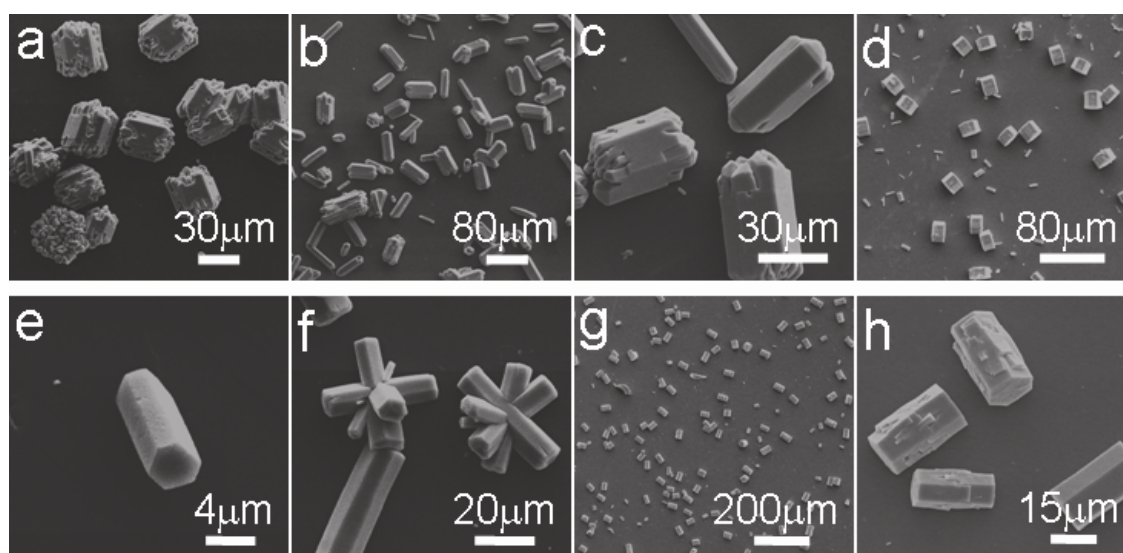

**Fig. S1** SEM images of BaCO<sub>3</sub> crystals obtained at the very dilute P<sub>123</sub> concentrations (g·L<sup>-1</sup>), (a) 4.5; (b, c) 3.2; (d, e) 2.7; (f) 2.2; (g, h) 1.5. The concentration of barium chloride was 20 mM.

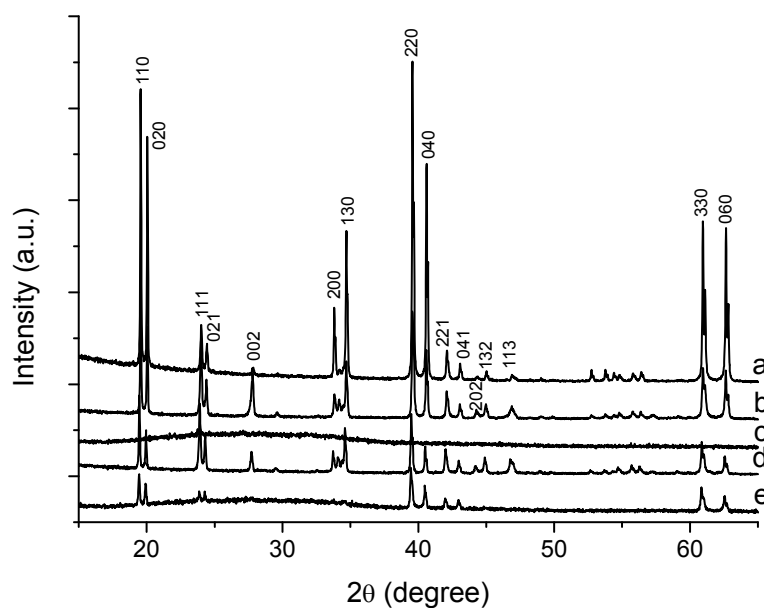

**Fig. S2** XRD patterns of barium carbonate crystals obtained in the presence of different polymer concentrations ( $\text{g}\cdot\text{L}^{-1}$ ). (a) 4.5; (b) 3.2; (c) 2.7; (d) 2.2; (e) 1.5. The concentration of barium chloride was 20 mM.

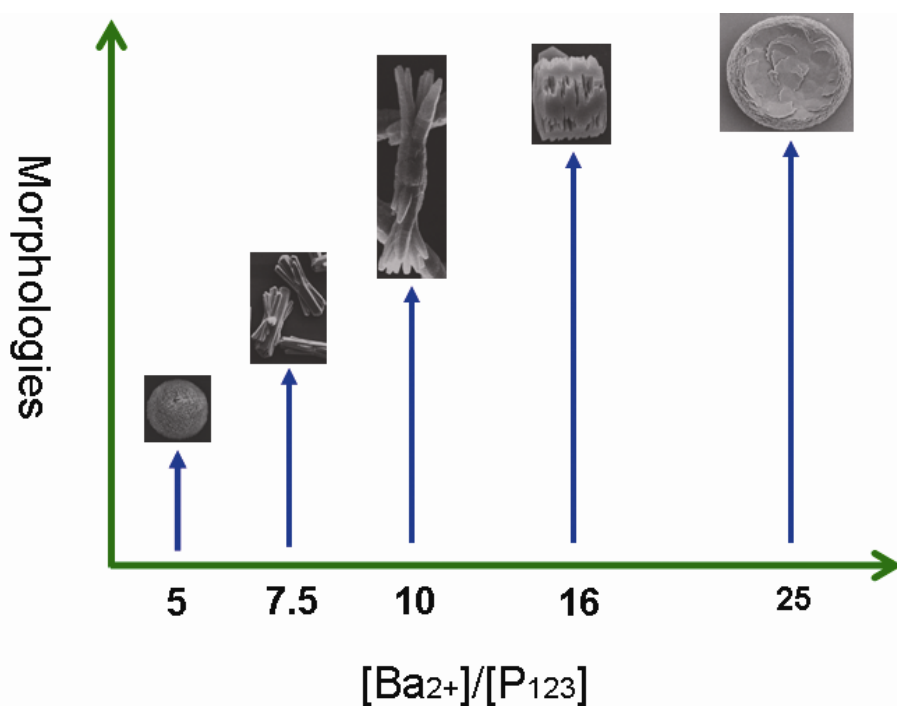

**Fig. S3** The shape mapping between the  $[\text{Ba}^{2+}]/[\text{P}_{123}]$  and the morphologies of the obtained  $\text{BaCO}_3$  crystals. All other conditions were kept constant.

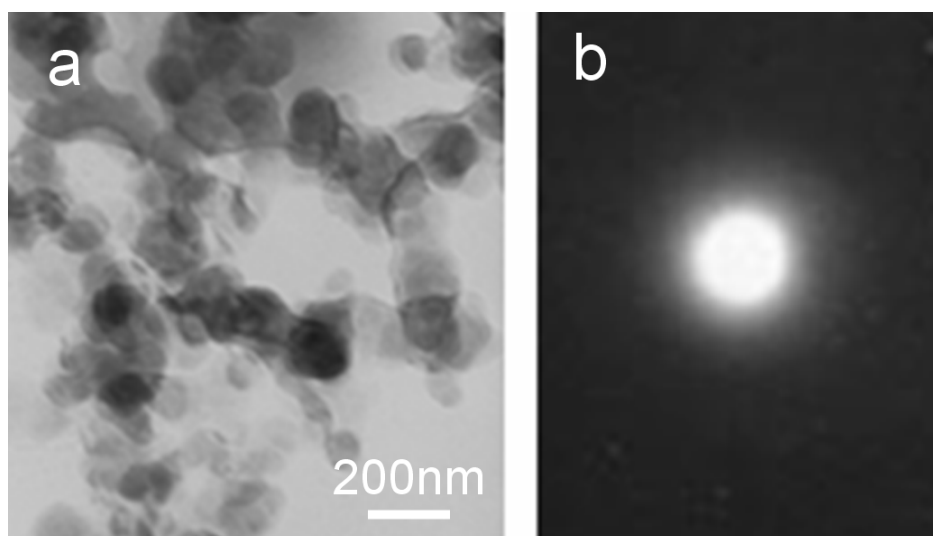

**Fig. S4** The TEM image (a) and ED pattern (b) of the formed  $\text{BaCO}_3$  precursor nanoparticles in the presence of  $\text{P}_{123}$  at early reaction stage.

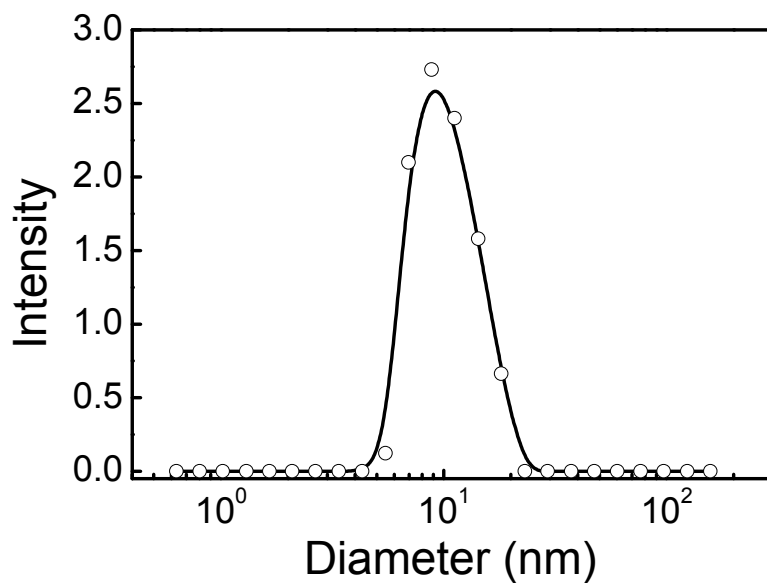

**Fig. S5** Dynamic light scattering (DLS) result of  $\text{P}_{123}$  colloidal solution when added into barium chloride by stirring for several minutes. The concentrations of  $\text{P}_{123}$  and barium chloride were  $8 \text{ g} \cdot \text{L}^{-1}$  and 20 mM, respectively.

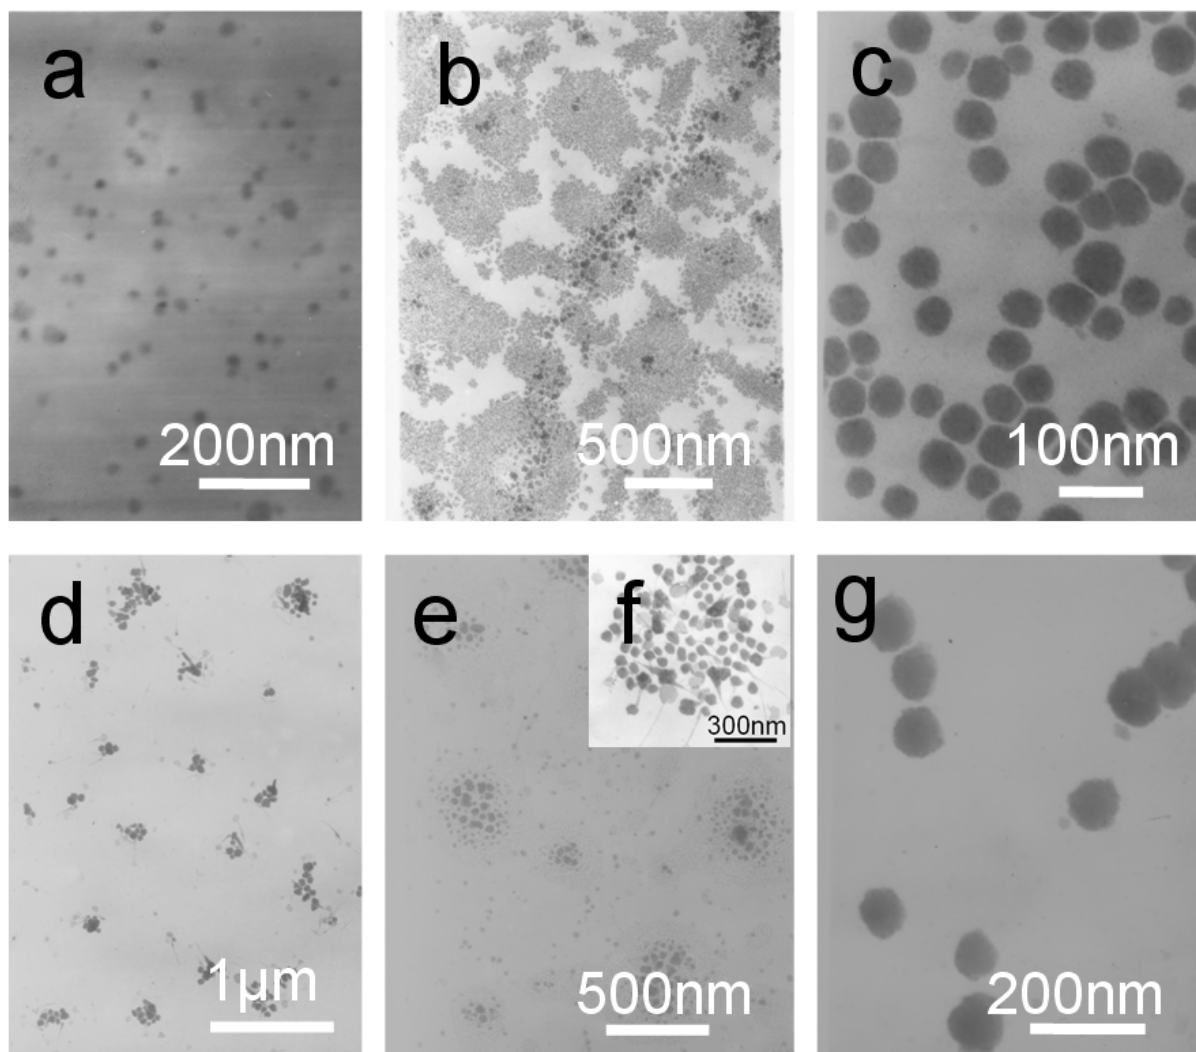

**Fig. S6** The evolution process of colloidal particles/ $\text{BaCO}_3$  complex aggregates formed in solution with reaction time prolonged. (a) 0 min; (b) 10 min; (c) 30 min; (d) 1 h; (e) 2 h; (f) partly magnification of (e) image; (g) 1 day.  $[\text{P}_{123}] = 8 \text{ g}\cdot\text{L}^{-1}$ ,  $[\text{Ba}^{2+}] = 20 \text{ mM}$ .
